# Supplementary material for: Impact of positive chest X-ray findings and blood cultures on adverse outcomes following hospitalized pneumococcal lower respiratory tract infection: a population-based cohort study
Source: PubMed Central journal article supplement (PMC3655859; doi:10.1186/1471-2334-13-197), 2013-05-02
Supplement: 1471-2334-13-197-S2.pdf [file 1471-2334-13-197-S2.pdf]

### Additional file 2 – Method of LRT-sampling according to LRTI manifestation group

|                            | No infiltrate and no bacteraemia patients | Infiltrate without bacteraemia patients | Bacteraemia patients | Total     | Total of those with a LRT sample obtained |
|----------------------------|-------------------------------------------|-----------------------------------------|----------------------|-----------|-------------------------------------------|
|                            | n (%)                                     | n (%)                                   | n (%)                | n (%)     | n (%)                                     |
| Method not specified       | 0 (0)                                     | 0 (0)                                   | 1 (0)                | 1 (0)     | 1 (0)                                     |
| Sputum                     | 177 (92)                                  | 204 (82)                                | 67 (26)              | 448 (64)  | 448 (80)                                  |
| Blind endotracheal suction | 10 (5)                                    | 43 (17)                                 | 32 (12)              | 85 (12)   | 85 (15)                                   |
| Bronco alveolar lavage     | 0 (0)                                     | 1 (0)                                   | 13 (5)               | 14 (2)    | 14 (3)                                    |
| Pleural fluid              | 6 (3)                                     | 2 (1)                                   | 1 (0)                | 9 (1)     | 9 (2)                                     |
| LRT sample not obtained    | 0 (0)                                     | 0 (0)                                   | 148 (56)             | 148 (21)  | -                                         |
| Total                      | 193 (100)                                 | 250 (100)                               | 262 (100)            | 705 (100) | 705-148 = 557 (100)                       |

LRTI, lower respiratory tract infection; LRT, lower respiratory tract
