# Supplementary material for: Impact of positive chest X-ray findings and blood cultures on adverse outcomes following hospitalized pneumococcal lower respiratory tract infection: a population-based cohort study
Source: PubMed Central journal article supplement (PMC3655859; doi:10.1186/1471-2334-13-197), 2013-05-02
Supplement: 1471-2334-13-197-S4.pdf [file 1471-2334-13-197-S4.pdf]

**Additional file 4 - CRP and leukocyte counts according to LRTI manifestation group, stratified by age groups**

|                                      | No infiltrate and no bacteraemia patients <sup>a</sup> | Infiltrate without bacteraemia patients <sup>a</sup> | Bacteraemia patients <sup>a</sup> |
|--------------------------------------|--------------------------------------------------------|------------------------------------------------------|-----------------------------------|
| CRP (mg/L)                           |                                                        |                                                      |                                   |
| <b>All patients</b>                  | <b>82 (36-140)</b>                                     | <b>163 (70-246)</b>                                  | <b>316 (219-404)</b>              |
| 15-49 years                          | 110 (50-157)                                           | 112 (62-223)                                         | 314 (247-434)                     |
| 50-74 years                          | 71 (32-148)                                            | 162 (78-252)                                         | 315 (216-414)                     |
| ≥75 years                            | 96 (51-131)                                            | 190 (80-249)                                         | 317 (192-388)                     |
| Leukocyte count (10 <sup>9</sup> /L) |                                                        |                                                      |                                   |
| <b>All patients</b>                  | <b>14 (11-17)</b>                                      | <b>14 (11-19)</b>                                    | <b>17 (12-23)</b>                 |
| 15-49 years                          | 14 (10-20)                                             | 14 (12-16)                                           | 17 (12-23)                        |
| 50-74 years                          | 14 (11-18)                                             | 15 (11-20)                                           | 16 (11-22)                        |
| ≥75 years                            | 15 (11-16)                                             | 14 (11-19)                                           | 18 (13-23)                        |

LRTI, lower respiratory tract infection; CRP, C-reactive protein

<sup>a</sup> Data are median (interquartile range)

Results were available for >87% of the patients.
