# Supplementary material for: Impact of positive chest X-ray findings and blood cultures on adverse outcomes following hospitalized pneumococcal lower respiratory tract infection: a population-based cohort study
Source: PubMed Central journal article supplement (PMC3655859; doi:10.1186/1471-2334-13-197), 2013-05-02
Supplement: 1471-2334-13-197-S5.pdf [file 1471-2334-13-197-S5.pdf]

## Additional file 5 – Outcomes according to LRTI manifestation group overall and for the four supplementary analyses

|                                            | No infiltrate and no bacteraemia patients |                       |                          | Infiltrate without bacteraemia patients |                       |                          | Bacteraemia patients |                        |                          |
|--------------------------------------------|-------------------------------------------|-----------------------|--------------------------|-----------------------------------------|-----------------------|--------------------------|----------------------|------------------------|--------------------------|
|                                            | n (%) <sup>a</sup>                        | Crude RR <sup>b</sup> | Adjusted RR <sup>c</sup> | n (%) <sup>a</sup>                      | Crude RR <sup>b</sup> | Adjusted RR <sup>c</sup> | n (%) <sup>a</sup>   | Crude RR <sup>b</sup>  | Adjusted RR <sup>c</sup> |
| <b>30-day-mortality</b>                    |                                           |                       |                          |                                         |                       |                          |                      |                        |                          |
| <b>All patients</b>                        | <b>9 (5)</b>                              | <b>1.0 (ref.)</b>     | <b>1.0 (ref.)</b>        | <b>27 (11)</b>                          | <b>2.4 (1.1-5.0)</b>  | <b>1.9 (0.9-4.1)</b>     | <b>54 (21)</b>       | <b>4.8 (2.4-9.6)</b>   | <b>4.1 (2.0-8.5)</b>     |
| Sub analysis 1 <sup>d</sup>                | 9 (5)                                     | 1.0 (ref.)            | 1.0 (ref.)               | 16 (8)                                  | 1.4 (0.6-3.2)         | 1.3 (0.5-3.0)            | 45 (20)              | 4.1 (2.0-8.4)          | 3.5 (1.6-7.3)            |
| Sub analysis 2 <sup>e</sup>                | 3 (4)                                     | 1.0 (ref.)            | 1.0 (ref.)               | 15 (11)                                 | 3.1 (0.9-10.5)        | 2.6 (0.7-9.4)            | 40 (20)              | 5.7 (1.8-18.6)         | 4.5 (1.4-14.9)           |
| Sub analysis 3 <sup>f</sup>                | 2 (3)                                     | 1.0 (ref.)            | 1.0 (ref.)               | 23 (12)                                 | 5.0 (1.2-21.3)        | 4.3 (1.0-18.8)           | 46 (20)              | 8.3 (2.0-34.1)         | 7.4 (1.8-31.2)           |
| Sub analysis 4 <sup>g</sup>                | 3 (3)                                     | 1.0 (ref.)            | 1.0 (ref.)               | 15 (8)                                  | 3.0 (0.9-10.0)        | 2.4 (0.7-8.7)            | 31 (16)              | 5.9 (1.8-19.8)         | 6.2 (1.9-20.8)           |
| <b>LOS (days)</b>                          |                                           |                       |                          |                                         |                       |                          |                      |                        |                          |
| <b>All patients</b>                        | <b>5 (2-9)</b>                            | <b>1.0 (ref.)</b>     | <b>1.0 (ref.)</b>        | <b>6 (4-16)</b>                         | <b>1.6 (1.3-2.0)</b>  | <b>1.5 (1.2-1.9)</b>     | <b>8 (4-19)</b>      | <b>2.0 (1.6-2.4)</b>   | <b>2.1 (1.7-2.6)</b>     |
| Sub analysis 1 <sup>d</sup>                | 5 (2-9)                                   | 1.0 (ref.)            | 1.0 (ref.)               | 6 (4-15)                                | 1.6 (1.3-2.0)         | 1.5 (1.2-1.9)            | 8 (5-19)             | 2.0 (1.6-2.4)          | 2.0 (1.6-2.6)            |
| Sub analysis 2 <sup>e</sup>                | 5 (2-16)                                  | 1.0 (ref.)            | 1.0 (ref.)               | 8 (3-21)                                | 1.8 (1.3-2.6)         | 1.8 (1.2-2.5)            | 8 (5-20)             | 1.9 (1.4-2.6)          | 2.0 (1.5-2.8)            |
| Sub analysis 3 <sup>f</sup>                | 5 (3-8)                                   | 1.0 (ref.)            | 1.0 (ref.)               | 6 (4-17)                                | 1.7 (1.2-2.2)         | 1.6 (1.1-2.1)            | 9 (5-20)             | 2.1 (1.6-2.8)          | 2.3 (1.8-3.1)            |
| Sub analysis 4 <sup>g</sup>                | 4 (2-8)                                   | 1.0 (ref.)            | 1.0 (ref.)               | 6 (4-12)                                | 1.6 (1.3-2.1)         | 1.5 (1.2-1.9)            | 8 (5-18)             | 2.2 (1.8-2.8)          | 2.4 (1.9-3.0)            |
| <b>ICU admission</b>                       |                                           |                       |                          |                                         |                       |                          |                      |                        |                          |
| <b>All patients</b>                        | <b>14 (7)</b>                             | <b>1.0 (ref.)</b>     | <b>1.0 (ref.)</b>        | <b>51 (20)</b>                          | <b>2.8 (1.6-5.0)</b>  | <b>2.4 (1.4-4.1)</b>     | <b>60 (23)</b>       | <b>3.2 (1.8-5.5)</b>   | <b>3.1 (1.8-5.5)</b>     |
| Sub analysis 1 <sup>d</sup>                | 13 (8)                                    | 1.0 (ref.)            | 1.0 (ref.)               | 37 (17)                                 | 2.3 (1.3-4.2)         | 2.0 (1.1-3.6)            | 48 (22)              | 2.8 (1.6-5.1)          | 2.7 (1.5-5.0)            |
| Sub analysis 2 <sup>e</sup>                | 7 (9)                                     | 1.0 (ref.)            | 1.0 (ref.)               | 38 (28)                                 | 3.2 (1.5-6.9)         | 2.7 (1.3-5.6)            | 47 (23)              | 2.7 (1.3-5.7)          | 2.7 (1.3-5.6)            |
| Sub analysis 3 <sup>f</sup>                | 6 (8)                                     | 1.0 (ref.)            | 1.0 (ref.)               | 42 (23)                                 | 2.9 (1.3-6.6)         | 2.3 (1.0-5.2)            | 58 (25)              | 3.2 (1.4-7.2)          | 3.2 (1.4-7.1)            |
| Sub analysis 4 <sup>g</sup>                | 5 (5)                                     | 1.0 (ref.)            | 1.0 (ref.)               | 30 (17)                                 | 3.5 (1.4-8.9)         | 2.5 (1.0-6.3)            | 44 (22)              | 4.8 (1.9-11.7)         | 5.0 (2.1-12.1)           |
| <b>Pulmonary complications<sup>h</sup></b> |                                           |                       |                          |                                         |                       |                          |                      |                        |                          |
| <b>All patients</b>                        | <b>2 (1)</b>                              | <b>1.0 (ref.)</b>     | <b>1.0 (ref.)</b>        | <b>12 (5)</b>                           | <b>4.6 (1.0-20.5)</b> | <b>4.6 (1.0-21.4)</b>    | <b>36 (14)</b>       | <b>13.3 (3.2-54.5)</b> | <b>12.6 (2.9-53.8)</b>   |
| Sub analysis 1 <sup>d</sup>                | 1 (1)                                     | 1.0 (ref.)            | 1.0 (ref.)               | 8 (4)                                   | 6.5 (0.8-51.5)        | 6.6 (0.8-57.9)           | 31 (14)              | 23.9 (3.3-173.8)       | 22.0 (2.9-167)           |
| Sub analysis 2 <sup>e</sup>                | 2 (2)                                     | 1.0 (ref.)            | 1.0 (ref.)               | 10 (7)                                  | 3.0 (0.7-13.3)        | 3.2 (0.7-14.7)           | 29 (14)              | 5.8 (1.4-23.6)         | 5.7 (1.4-24.0)           |
| Sub analysis 3 <sup>f</sup>                | 1 (1)                                     | 1.0 (ref.)            | 1.0 (ref.)               | 9 (5)                                   | 3.8 (0.5-29.4)        | 3.7 (0.4-30.9)           | 34 (14)              | 11.3 (1.6-81.3)        | 10.6 (1.4-77.8)          |
| Sub analysis 4 <sup>g</sup>                | 0 (0)                                     | 1.0 (ref.)            | 1.0 (ref.)               | 4 (2)                                   | -                     | -                        | 31 (16)              | -                      | -                        |

LRTI, lower respiratory tract infection; RR, relative risk; LOS, length of stay; ICU, intensive care unit; ref, reference; CI, confidence interval.

<sup>a</sup> Data are median (interquartile range) or n (% of all in the manifestation group).

<sup>b</sup> The crude measures are median ratios (95% CI), prevalence proportion ratios (95% CI) or MRR (95% CI).

<sup>c</sup> The multiple adjusted relative risks are computed using cox-regression for the 30-day-MRR, linear regression for LOS, and Poisson regression for ICU admission and pulmonary complications. The estimates are adjusted for age, sex, smoking, alcohol, and comorbidity.

<sup>d</sup> Restriction to patients who all had CRP >100mg/L or leukocytes >10\*10<sup>9</sup>/L and at least one new or increased pulmonary symptom.

<sup>e</sup> Restriction to patients without chronic pulmonary disease.

<sup>f</sup> Restriction to patients who have all had chest X-rays and blood cultures taken.

<sup>g</sup> Restriction to patients with an ICD-10 discharge diagnosis of acute LRTI (ICD10 codes: J13, J18.0, J18.1, J18.2, J18.8, J18.9, J20, J20.2, J20.9, J22, J44.0, J44.1).

<sup>h</sup> Pulmonary complications include pleural effusion, pleural drainage, empyema, and lung abscess.

Data available for over 99%.
